# Supplementary material for: Enhanced Anti-Liver Tumor Efficacy of Chimeric Antigen Receptor-T Cells via SATB1 Modulation
Source: Research Square preprint supplement (doi:10.21203/rs.3.rs-6776099/v1), 2025-06-18
Supplement: Supplementary file 2 [file 2A.xlsx]

## Sheet: Sheet1
	gapdh			satb1
CAR-T-1	17.0864	17.1122	17.0465	21.8166	21.8209	21.8111
SATB1-CAR-T-1	17.0338	16.9969	17.0072	20.9982	20.8731	21.0272
CAR-T-2	18.3978	18.3672	18.4197	22.0286	22.0888	22.1242
SATB1-CAR-T-2	18.499	18.529	18.4827	20.771	20.8811	20.7612
CAR-T-3	16.6931	16.7032	16.6704	21.9257	21.8578	21.9365
SATB1-CAR-T-4	16.2219	16.4183	16.4153	20.878	20.7849	20.758
