# Supplementary material for: Enhanced Anti-Liver Tumor Efficacy of Chimeric Antigen Receptor-T Cells via SATB1 Modulation
Source: Research Square preprint supplement (doi:10.21203/rs.3.rs-6776099/v1), 2025-06-18
Supplement: Supplementary file 6 [file S4E.xlsx]

## Sheet: Sheet1
5.23	zjk				45087	c'c'x				45097	zl					ccx				7月16	zl
		fm	sm			nc	fm	sm				nc	fm	sm			nc	fm	sm				fm	sm
-		2482	2921		-	1218	1188	1552			-	815	1125	2100		-	1312	923	817		-		1905	2343
+		1577	2337		24	951	986	1371			24	594	725	1521		24	779	798	728		24		1463	2135
					48	985	909	1263
						1		1.27422				1		2.57669			1		0.622713
						0.780788		1.12562				0.728834		1.86626			0.59375		0.554878
		1	1.17687			0.808703		1.03695					1	1.86667				1	0.885157				1	1.22992
		0.635375	0.941579				1	1.3064					0.644444	1.352				0.864572	0.788732				0.767979	1.12073
							0.829966	1.15404
							0.765152	1.06313
														823	1893
														777	1409
														1	2.30012
														0.944107	1.71203
			fm						sm
不加			1		1	1	1		1.17687	1.35199	1.36824			1.16525
tgf-b			0.635375		0.73133	0.706507	0.699892		0.941579	1.05852	1.07124			1.00851
			1	1	1	1			1.17687	1.3064	1.86667	1.22992
			0.635375	0.765152	0.644444	0.767979			0.941579	1.06313	1.352	1.12073
